# Supplementary material
Source: PubMed Central journal article supplement (PMC6599278)

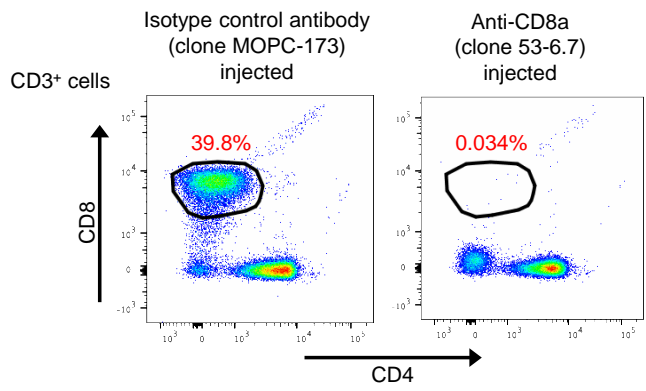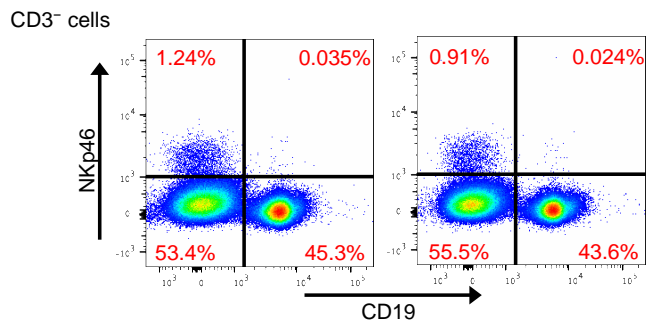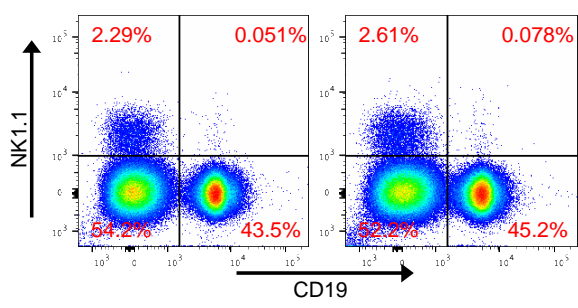

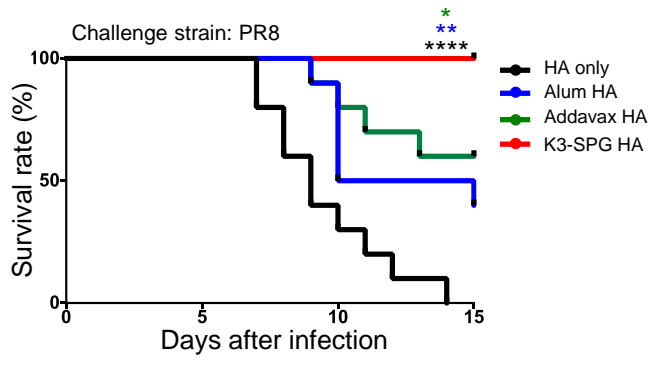

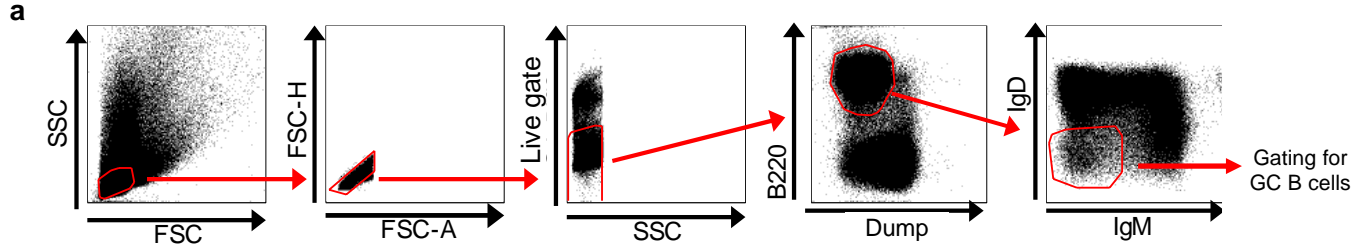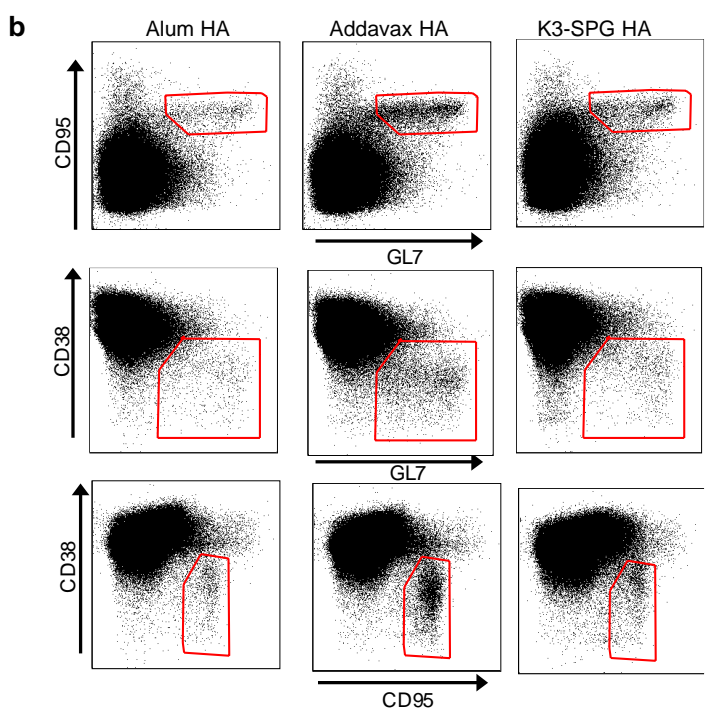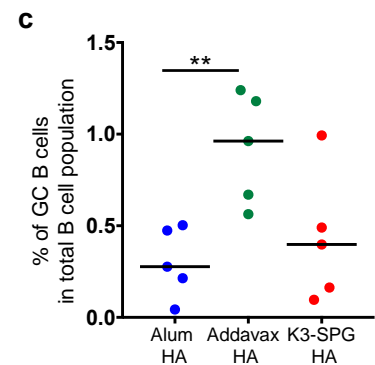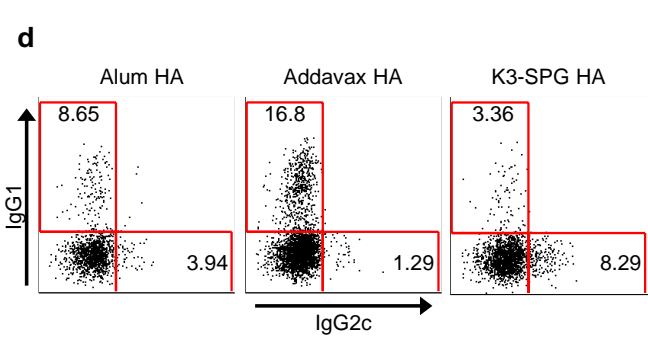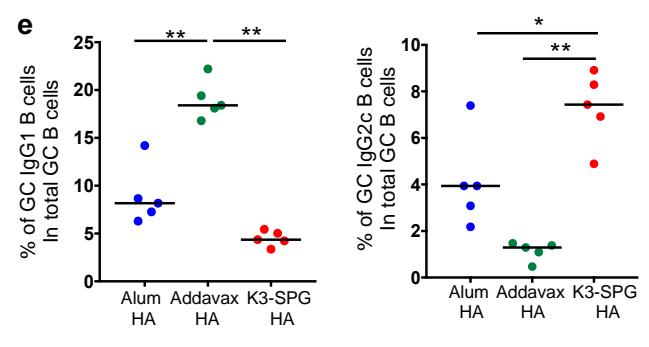

Supplement: dxy069_suppl_supplementary_figures.pdf [file dxy069_suppl_supplementary_figures.pdf]
